# Supplementary material
Source: Research Square preprint supplement (doi:10.21203/rs.3.rs-9686077/v1)
Supplement: Supplementary file 1 [file ba319e405394cfc7abd63710.docx]

**Appendix**

Table A1 Interview Guideline

Table A2 Concept elicitation: impact of caregiving on health and wellbeing

Table A3 Cognitive debriefing framework

Table A4 Relevance and comprehensibility of the EQ-HWB

Table A5 Comprehensiveness of EQ-HWB

Table A6 Appropriateness of Response Options of EQ-HWB

Table A7 Appropriateness of recall period of EQ-HWB

Table A8 Suggested modifications to EQ-HWB

Table A1 Interview Guideline

| **Step and Theme** | **Specific Procedures** | **Interviewer Script** | **Rationale / Notes** |
| --- | --- | --- | --- |
| **Pre-interview 1: Preparation and confirmation** | Confirm that informed consent has been obtained; check the internet connection, audio recording, screen sharing, and the order of PPT/questionnaires; briefly explain the interview procedure and duration again | Today’s interview will take about **90 minutes**. We will first briefly talk about your caregiving experiences, then move on to the **think-aloud** questionnaire completion, and finally discuss your views on the questions. Everything shared in this interview will be kept confidential, so please feel free to share your genuine thoughts. | Helps participants feel safe and ensures the interview proceeds smoothly; explaining the procedure in advance can reduce anxiety |
| **Pre-interview 2: Rapport building and ground rules** | Explain that there are no right or wrong answers; encourage honest expression; remind participants that they may pause, drink water, or rest at any time | There are no “right” or “wrong” answers today. What we care about most is how you understand the questions and why you answer them the way you do. If you feel tired at any point, please let me know and we can pause. | Reduces response pressure and improves the authenticity of feedback |
| **Step 1: Warm-up** | Invite the participant to briefly introduce themselves and describe their daily caregiving situation | Could you first briefly introduce yourself and tell me what a typical day of caring for your child looks like? | Serves as an ice-breaker, helping the participant relax and enter the caregiving context |
| **Step 2: Concept elicitation** | Use caregiving experiences to introduce the core concepts of health, quality of life, and happiness/wellbeing | In what ways do you think caring for your child has affected your life? For example, your physical health, work, emotions, or social relationships. How do you usually understand concepts such as “health,” “HRQoL,” and “HWB”? | Provides contextual grounding for later discussion of questionnaire content and helps identify issues that matter spontaneously to participants |
| **Step 3: Explanation of the Think Aloud method** | Briefly explain the purpose and requirements of the Think Aloud method; share an instruction page if needed | Next, we will use the **think-aloud** method. This means that while reading each question, I would like you to say out loud whatever comes to mind, including how you understand the question, why you choose a particular answer, and whether you feel uncertain or confused. | Helps participants understand that the focus is not on answering quickly, but on verbalising their thought process |
| **Step 4: Practice of the Think Aloud method** | The interviewer demonstrates once, and the participant then imitates by completing one practice question to become familiar with the Think Aloud method | Let’s do a quick practice first. Please respond just as you would in the real task, saying out loud everything that comes to mind when you see the question. I may prompt you to keep talking if needed. | Practice reduces silence during the formal session and improves data quality |
| **Step 5: Formal Think Aloud – questionnaire completion** | Present questionnaire items one by one, with the participant answering while verbalising their thoughts | We will now begin the formal part. Please follow the same approach as in the practice: read each question and tell me your understanding, judgement, and reasons for your answer as you go. | Captures participants’ immediate cognitive process regarding the item, response options, and recall period |
| **Step 6: Probing and process exploration** | Ask follow-up questions when the participant pauses, gives only an answer, shows unclear understanding, or hesitates | Could you tell me a bit more about how you arrived at that answer? / What do you think this question is mainly asking about? / Why are you hesitating between these response options? | The core aim is to trace the thinking process rather than simply record answers; probing should be moderate and not disrupt the natural flow |
| **Step 7: Additional probing for “no problems/no difficulties” responses** | If the participant selects “no problems/no difficulties,” further confirm whether the item is actually capturing the intended content | You selected “no problems.” What do you think this question is mainly trying to measure? | Helps avoid assuming that a “no problems” response means the item is appropriate; useful for identifying relevance or wording issues |
| **Step 8: Break** | Take a short break after completing one round of questionnaire items | Let’s take a short break. You may have some water and relax for a few minutes. | Reduces fatigue, especially in online interviews and longer sessions |
| **Step 9: Transition to cognitive interviewing** | Clearly explain that the next part will focus on item relevance, comprehensibility, comprehensiveness, response options, and recall period | Next, I’d like to continue by discussing the questions themselves, such as whether they are relevant to you, easy to understand, and whether anything important is missing. Some questions may feel repetitive, but please answer based on your genuine feelings. | Helps participants understand that the focus is shifting from the answering process to evaluating the items themselves |
| **Step 10: Relevance assessment** | Ask item by item, or by section, whether the questions are relevant to the participant, their caregiving experience, and their health/quality of life/wellbeing | Is this question relevant to you? Does it reflect an important aspect of your health, quality of life, or wellbeing? In the context of caring for your child, is this item important? | Assesses whether the items genuinely reflect the experiences of the target population |
| **Step 11: Comprehensibility assessment** | Ask whether the wording, examples, response options, and instructions are clear, and whether there is any ambiguity or misunderstanding | When you read this question, what do you think it means? Are there any words, expressions, or examples that seem unclear? If you were to rephrase it, how would you make it clearer? | Used to identify problems such as unclear wording, vague concepts, or misinterpretation |
| **Step 12: Comprehensiveness assessment (item level)** | Ask whether the item misses any important aspects of that dimension | For this question specifically, do you think there is anything important that has not been asked? For example, are there other situations that belong to this area but are not reflected in the question? | Examines whether each individual item provides sufficient coverage |
| **Step 13: Response option appropriateness assessment** | Ask whether the response options sufficiently distinguish levels of severity and cover real-life situations | Do you think these response options are adequate? Can they distinguish different levels of your situation? What does each option mean to you? | Assesses whether the response options are insufficiently distinct, overlapping, or difficult to use |
| **Step 14: Recall period assessment** | Ask whether the recall period (e.g. “the past week”) is appropriate and can accurately reflect the participant’s status | If you are asked to think back over the past week, does that feel appropriate to you? Would it be too short, too long, or difficult to summarise accurately? | Assesses whether the recall period is appropriate |
| **Step 15: Comprehensiveness assessment (overall scale)** | After discussing individual items, invite the participant to evaluate whether anything important is missing from the scale as a whole, and whether any items feel repetitive or overlapping. If so, ask which item they prefer and why. | Looking at the scale as a whole, do you think anything important to you has been left out? Are there any questions you particularly wish could be added? Do any items feel repetitive or overlapping? If so, which item do you prefer, and why? | Identifies broader gaps beyond individual items, also helps identify conceptual overlap between items and participants’ preferences for wording or item retention. |
| **Step 16: Overall acceptability and completion experience** | Ask whether the scale as a whole is clear, easy to answer, too long, or repetitive | Overall, do you find this questionnaire clear? Is it easy to answer? Does anything feel repetitive, difficult, or not suitable for you? | Used to assess practical acceptability and feasibility of implementation |
| **Step 17: Summary and confirmation** | The researcher summarises the main feedback and invites the participant to confirm or add anything | Today, you mentioned several key points, including… Have I understood you correctly? Is there anything else that you feel is important but we have not yet discussed? | Serves as member checking to ensure that the researcher has understood the participant accurately |
| **End of interview** | Thank the participant, explain confidentiality again, and inform them about the participant incentive | Thank you very much for sharing your experiences today. Your feedback is extremely valuable for improving the questionnaire. We will keep your information strictly confidential. If you think of anything else later, you are very welcome to let us know. The participant incentive will be sent to your WeChat later, so please keep an eye out for it. | Ends the interview in a formal and warm manner, helping maintain a positive participant experience |

Table A2 Concept elicitation: impact of caregiving on health and wellbeing (n = 31)

| **Main category / Item** | **Subcategory** | **Frequency** |
| --- | --- | --- |
| **Spontaneous mentions of EQ-HWB concepts during concept elicitation** | | |
| 7. Have problems with your sleep? | Difficulty falling asleep; frequent night waking; restless sleep due to worrying about the child; sleep interrupted by the child’s night waking or unusual behaviours; early waking; poor sleep quality | 16/31 |
| 1. Doing day-to-day activities? (e.g. working, shopping, housework) | Work affected; shopping/grocery buying; housework; dropping off/accompanying the child; accompanying medical or training visits; managing family affairs; personal daily routines disrupted by caregiving tasks | 15/31 |
| 13. Feel anxious? | Worry about the child’s development; worry about rehabilitation outcomes; worry about future education and employment; worry about financial pressure; worry about not caring well enough; persistent unresolved anxiety | 15/31 |
| 15. Feel frustrated? | Long-term effort without seeing improvement; repeated setbacks; low mood; loss of motivation; feeling life is being held back; feeling powerless about reality | 15/31 |
| 2. Doing enjoyable activities? (e.g. leisure, hobbies) | Reduced leisure time; unable to go out and relax; giving up hobbies; lack of personal time; fewer social/recreational opportunities; reduced enjoyment in life | 13/31 |
| 8. Feel exhausted? | Physical fatigue; mental exhaustion; long-term caregiving burnout; low daytime energy; ongoing depletion; exhaustion after combined caregiving, housework, and work demands | 12/31 |
| 3. Getting around inside or outside? (using mobility aids if normally used) | Restricted outings; difficulty taking the child out; travelling to hospitals or institutions; reduced freedom of movement | 6/31 |
| 10. Feel that people did not support you? | Insufficient support from spouse; insufficient support from grandparents or relatives; lack of understanding from friends; limited support from schools or institutions; insufficient social resources; inadequate policy or community support; lack of emotional and practical help | 6/31 |
| 23. How much physical pain did you have in the past 7 days? | Low back pain; neck/shoulder pain; headache; muscle soreness; fatigue-related pain; worsening chronic pain; pain interfering with caregiving and rest | 5/31 |
| 25. How much physical discomfort did you have in the past 7 days? | Nausea; shortness of breath/breathlessness; chest tightness; gastrointestinal discomfort; palpitations; itching; discomfort caused by caregiving burden | 5/31 |
| 19. Feel unable to cope with your day-to-day life? | Difficulty balancing caregiving, work, and housework; too many tasks to manage; emotionally unable to hold on; disrupted daily functioning; insufficient resources to cope with everyday stress | 4/31 |
| 14. Feel unsafe? (e.g. fear of falling, physical harm, or being hit) | Worry that the child may get lost or injured; worry about risks when outside; concern that the caregiving environment is unsafe; insecurity about unexpected events | 3/31 |
| 4. Washing, using the toilet, getting dressed, eating, or caring for your appearance | Irregular eating; no time to take care of one’s appearance; basic daily needs interrupted by the child’s needs | 3/31 |
| 9. Feel lonely? | Lack of companionship; no one truly understands; difficulty confiding in others; lack of empathy for caregiving experiences; long-term emotional burden carried alone | 3/31 |
| 12. Have difficulty concentrating or thinking clearly? | Distractibility; inability to concentrate because of constant worry about the child; reduced information-processing ability | 2/31 |
| 20. Feel excluded by others? (e.g. no sense of belonging, or unable to be yourself) | Excluded by groups of parents of typically developing children; family marginalisation; disconnected from the outside world; feeling excluded because the child is excluded | 2/31 |
| 21. Have negative feelings about yourself? | Self-blame; blaming oneself for not taking good enough care of the child; low self-evaluation | 1/31 |
| 11. Have difficulty remembering? | Forgetting training arrangements; forgetting appointments or class times; forgetting because of too many things on one’s mind; memory affected by mental fatigue; poorer memory under multitasking | 1/31 |
| 5. Seeing? (using glasses/contact lenses if normally used) | — | 0 |
| 6. Hearing? (using hearing aids if normally used) | — | 0 |
| **Other important impacts spontaneously reported** | | |
| Financial situation | Rehabilitation/training costs; medical expenses; education and intervention costs; reduced family income; loss due to one parent quitting work to provide care; long-term financial pressure from caregiving | 12/31 |
| Caregiving-related worries | Worry about changes in the child’s condition or symptoms; worry about development and prognosis; worry about future independent living; worry about school adjustment; worry that no one will take over caregiving; worry about what will happen to the child when the caregiver grows old | 10/31 |
| Appetite | Poor appetite; inability to eat; appetite affected by stress; binge eating or disordered eating; irregular meals | 6/31 |
| Social participation | Going out less; fewer gatherings; avoiding social occasions; difficulty attending parent/friend activities; stress in public settings | 6/31 |
| Marital relationship | Communication conflict; arguments over child-related issues; emotional distance in the intimate relationship; inconsistency in coping with stress together | 4/31 |
| Self-image and weight management | Body-shape changes; weight out of control; neglect of appearance because of stress; hair loss | 4/31 |
| Happiness / wellbeing | Reduced life satisfaction; less happiness; reduced sense of family harmony; overall subjective evaluation of whether life is going well | 3/31 |
| Social discrimination and stigma | Others’ judgmental looks; being blamed for not disciplining the child properly; feeling ashamed in public; lack of social acceptance | 3/31 |

Table A3 Cognitive debriefing framework

| **Comprehensibility (Understanding/Interpretation)** |
| --- |
| Understanding or interpretation correct including value of examples |
| U1 Understanding or interpretation problems Wrong or ambiguous interpretation |
| U2 Understanding or interpretation problems Difficulty interpreting/ odd wording |
| U3 Understanding or interpretation problems Narrow interpretation |
| U4 Understanding or interpretation problems Word means a different thing in translation |
| U5 Understanding or interpretation problems - Different answers for different aspects of items |
| U6 Understanding or interpretation problems - Issues with examples |
| UX New themes not already identified |
| Unclear - unclear if respondent understands |
| **Relevance / Acceptability** |
| Number reporting relevance or acceptability |
| AR1 Lack of acceptability/relevance: item not relevant for them |
| AR2 Lack of acceptability/relevance: respondent says item not relevant because they misunderstood item |
| ARX Use to identify new themes |
| Unclear - unclear whether item is relevant to respondent e.g. talks in general terms, refers to time period in the past or specific events or is answering a different question etc. |
| **Comprehensiveness** |
| Number reporting instrument comprehensiveness |
| COM1 Issues with coverage: missing items. List items with accompanying quote |
| COM2 Issues with coverage: overlap in items - item covered by another item (note any suggestions e.g. combine items) |
| COMX Issues with coverage: new themes |

Table A4 Relevance and comprehensibility of the EQ-HWB (n = 31)

| **Item #** | **Item Text** | **Reported relevant/acceptable** | **Relevance Issues** | **Correct understanding** | **Understanding Issues** | **Illustrative Positive Quotes** | **Illustrative Negative Quotes** | **Additional Descriptive Findings**  **& New Themes** |
| --- | --- | --- | --- | --- | --- | --- | --- | --- |
| 1 | doing day-to-day activities? (e.g. working, shopping, housework) | 31/31 | 12/31 | 31/31 | 2/31 | F07_B08: “It is very representative! Going to work, shopping, and doing housework all belong to daily activities. Basically, the first one must be going to work…”  M03_B09: “Just the things you normally do every day! If you are working, then it would be going to work and coming home from work, then doing housework. Shopping might be less frequent.” | AR1 Lack of acceptability/relevance (12/31) *M20_B08: “Parents like us who stay at home full-time to accompany our children. Do you think ‘going to work’ is representative of daily activities? For people who go to work it is representative, but for me, my ‘work’ is taking care of my child.”  F10_B08: “Shopping is not a daily activity. It is something you do only when there is a need. Nowadays many things are bought online, even groceries.”*  U5 Multidimensional interpretation conflict (2/31)  *F06_B08: “ I think this item mixes work and life together, but they are actually different aspects……like me, are unable to work but still do housework as usual, so responses may differ depending on the perspective taken.* | Ranking of examples:  13/31 work > housework > shopping; 9/31 housework > work > shopping; 11/31None  ARX New themes (8/31): Suggestions to add examples more closely related to caregivers (e.g. taking care of children, buying groceries)  *M09_G08: “I think it should include something like ‘taking care of children’.”*  *F01_B08: “Buying groceries. Buying groceries is something that is done every day.”* |
| 2 | doing enjoyable activities? (e.g. leisure, hobbies) | 29/31 | 2/31 | 31/31 | — | F03_B10: “Playing ball helps release stress and shift my attention.”  F02_B10: “My understanding is that activities that make you feel happy are called leisure activities.” | AR1 Lack of acceptability/relevance (2/31) F08_B12: “I feel my answer may not be very applicable, because I don’t really have any leisure activities.” | UX New theme (2/31): Suggest adding “personal hobbies”  M10_B14: “You could add personal hobbies… better reflect an individual’s leisure activities.” |
| 3 | getting around inside or outside? (using e.g. a walking stick or wheelchair if you normally use them) | 20/31 | 11/31 | 31/31 | 11/31 | F08_B12: “Getting around means being able to walk normally…”  F01_B08: “For mobility, my understanding is that it means being able to go wherever you want…” | AR1 Lack of acceptability/relevance (11/31)  F10_B08: “I don’t have any problems with mobility … I haven’t reached the point of needing a walking stick or wheelchair.”  U2 Difficulty interpreting / odd wording (3/31)  F06_B08: “I couldn’t understand it … I really couldn’t understand what ‘getting around inside’ means.”  U3 Narrow interpretation (8/31)  F03_B10: “This might apply only to people with disabilities … people who have long-term difficulty walking.”  U5 Different answers for different aspects of the item (2/31)  M04_G17: “If you need a wheelchair, then it means difficulty getting around … If the child is highly dependent … outdoor mobility may be restricted.”  U6 Issues with examples (6/31)  F08_B12: “I understood this question as asking whether I need a walking stick or a wheelchair … I’m not sure what the intention of the question is.” | Item seen as more relevant to people with disabilities; difficulty with “getting around inside”; examples (walking stick/wheelchair) not always helpful for caregivers |
| 4 | washing, using the toilet, getting dressed, eating, or caring for your appearance? | 22/31 | 9/31 | 24/31 | 13/31 | F05_B09: “I think this also reflects a kind of neglect of oneself…”  M03_B09: “It’s about how you take care of yourself in daily life…” | AR1 Lack of relevance (9/31)  F04_B12: “If you ask an adult this, it feels almost like not asking at all. Adults generally do not have difficulty with these things.”  U3 Narrow interpretation (3/31)  F07_B08: “This seems to be targeted at people with disabilities … unless someone has a severe mental illness or very severe depression …”  U5 Different answers across aspects (10/31)  F10_B08: “I would suggest separating them … The first four aspects relate to basic self-care, while ‘caring for your appearance’ reflects a higher-level demand …” | Participants suggested separating “caring for your appearance” (higher-level/psychological) from basic self-care; narrow view as only for severe disability/mental illness |
| 5 | seeing? (using e.g. glasses or contact lenses if you normally use them) | 17/31 | 14/31 | 27/31 | 4/31 | M13_B14: “When I saw this item, I immediately felt it was necessary, because there was a period when I was in a very bad mood and I felt that my vision was blurred.”  F01_B08: “Seeing things, for example reading newspapers…” | AR1 Lack of relevance (10/31)  F06_B08: “I’m not disabled, so of course I can see things … If someone cannot even see or hear, how could they take care of a child?”  AR2 Lack of relevance due to misunderstanding (4/31)  M09_G08: “I felt that this questionnaire was designed to examine whether this group has depression.”  U3 Narrow interpretation (3/31)  M09_G08: “Depression affect seeing things……where vision or hearing would actually be affected.”  U6 Issues with examples (1/31)  M12_B08: “It seems to mean people who need to wear glasses should answer according to their usual situation. It sounds a bit awkward …” | Linked by some to somatic symptoms of depression (rare); not seen as relevant for caregivers unless severe disability |
| 6 | hearing? (using e.g. hearing aids if you normally use them) | 11/31 | 20/31 | 25/31 | 6/31 | M13_B14: “Hearing things unclearly, or often feeling that you cannot clearly hear what others are saying…”  M01_B10: “Whether you can hear sounds clearly.” | AR1 Lack of relevance (17/31)  F03_B10: “When I saw the later items, it felt like some of them might be more related to people with disabilities.”  Unclear relevance (3/31)  F05_B09: “If understood literally, hearing things seems more like a health issue. But when placed in the context of caring for a child, it becomes harder to understand. Hearing problems usually occur only in special situations, so it is difficult to see how this relates to caring for a child. Therefore, the relevance of this question is somewhat unclear.”  U3 Narrow interpretation (4/31) F06_B08: Why not just ask directly whether the person has a physical impairment? If someone already has a disability certificate, then they are a care recipient themselves.  U2 Difficulty interpreting /odd wording (2/31) F04_B12: “It was difficult to understand. I think it should be written more clearly.” | Viewed as purely physiological/physical impairment; low relevance for caregivers |
| 7 | have problems with your sleep? | 31/31 | — | 31/31 | — | M02_B13: “The most common problem for me is not being able to fall asleep…”  M01_B10: “It mainly refers to whether there are problems such as insomnia, sleep quality…” | — | High relevance and clear understanding of insomnia/sleep disorders |
| 8 | feel exhausted? | 31/31 | — | 31/31 | — | F08_B12: “My energy is already not enough… feel completely exhausted…” F05_B09: “Feeling exhausted means being very tired in terms of energy and physical strength…” | — | Very relevant for caregivers (energy drain from work/childcare) |
| 9 | feel lonely? | 31/31 | — | 31/31 | — | M17_B09: “Sometimes I feel lonely when my child goes to school…” M02_B13: “Feeling lonely means experiencing a lack of social relationships…” | — | Clear emotional interpretation tied to family/work isolation |
| 10 | feel that people did not support you? | 31/31 | — | 31/31 | — | F08_B12: “When I want to do something but others don’t support it… At home this is very obvious…”  M17_B09:*I think “not being supported by others” means that family members or friends do not support your views, do not approve of what you do, do not try to see things from your perspective, and do not help you when you need it, which can make you feel very helpless and afraid.* | — | Common examples: conflict with grandparents over child-rearing |
| 11 | have difficulty remembering? | 28/31 | 3/31 | 28/31 | 3/31 | F01_B08: “For example, if you are supposed to go to see a doctor today but forget about it…” M12_B08: “It means that memory is not very good—memory decline.” | AR1 Lack of acceptability/relevance (3/31)  M6_B08: “How could people in their thirties or forties like us possibly have difficulty remembering things? We are not yet at the age of becoming forgetful.”  U3 Narrow interpretation (3/31)  F04_B12: “It felt like this question was asking about older people, like dementia. Difficulty remembering things seemed more like checking whether an older person might have early signs of an age-related condition.” | Some linked it to aging/dementia or anxiety/depression |
| 12 | have difficulty concentrating or thinking clearly? | 27/31 | 4/31 | 27/31 | 4/31 | M16_B08: “I stay focused on watching him… as soon as I see that he might touch someone, I intervene…” M14_B09: “This is also about a person’s psychological condition…” | AR1 Lack of acceptability/relevance (4/31) F04_B12: “It feels more like a question asked of older people—basic questions used to judge whether someone may already be developing some age-related conditions.”  U3 Narrow interpretation (4/31) F11_B13: “If someone has difficulty concentrating or thinking clearly, that means the person must already be in an abnormal condition and probably needs treatment.” | Relationship between “concentrating” and “thinking clearly”:  10/31 same/closely related  M12_B08: “I think the two are closely related. A person needs to concentrate in order to think seriously about something. If someone cannot concentrate, their logical thinking will also become unclear.”  7/31 different  F08_B12: “I think they are different. Concentration means whether you are distracted—for example, in a meeting, whether you can listen from beginning to end, or in a class, how many minutes you actually pay attention. Thinking clearly refers more to logical thinking, like when solving math problems—whether the thinking process is clear. So I think they are different: one is attention, and the other is thinking ability and logic.”  14/31 no clear opinion  F04_B12: “In practice, these definitions are not always strictly distinguished.” |
| 13 | feel anxious? | 31/31 | — | 31/31 | — | F02_B10: “Anxiety—I often feel anxious. Sometimes it may be related to my child…” F07_B08: “Anxiety is usually related to uncertainty about the future…” | — | Very high relevance (child/work pressure) |
| 14 | feel unsafe? (e.g. fear of falling, physical harm, abuse) | 19/31 | 11/31 | 22/31 | 9/31 | F01_B08: “Feeling unsafe may involve two aspects… fears such as falling…”  F07_B08: “Feeling unsafe means feeling as if you no longer have the ability to control yourself…” | AR1 Lack of relevance (11/31)  F06_B08: “I don’t have this kind of feeling, so I cannot answer this question.”  U2 Difficulty interpreting / odd wording (1/31)  F01_B08: “These three phrases seem to point in slightly different directions, so it is unclear what exactly the question intends to express.”  U3 Narrow interpretation (2/31)  M12_B08: “Feeling unsafe—I think it refers more to suicide or self-harm …”  U5 Multidimensional interpretation conflict (4/31)  F10_B08: “The item ‘feeling unsafe’ and the examples in the brackets refer to two different levels … the examples seem more related to physical safety, but ‘feeling unsafe’ itself sounds more like psychological insecurity.”  U6 Example-related problems (2/31)  F06_B08: “The examples did not help me understand the question. If the intention was to ask about a sense of safety, this may not be the best way to phrase it.” | Disconnect between “feel unsafe” (psychological) and physical examples; some saw it as suicide/self-harm |
| 15 | feel frustrated? | 31/31 | — | 31/31 | — | F01_B08: “Feeling frustrated—for example, when you have taught the child for a long time but they still cannot learn it…” F07_B08: “There are many situations where you feel powerless…” | — | Strong relevance (helplessness in childcare/work) |
| 16 | feel sad or depressed? | 31/31 | — | 31/31 | — | M20_B08: “Over time you may feel suppressed and gradually become more discouraged…” F10_B08: “I think sadness is a more direct emotion… Feeling depressed, however, is more easily triggered.” | — | Relationship: 12/31 same/related; 10/31 different; 3/31 overlap with “frustrated”  Same/closely related concepts (12/31)  F05_B09: “The two are related. Feeling depressed can lead to sadness, and sometimes both occur at the same time. Sadness can also lead to depression. For example, if you feel sad but have no one to talk to—especially when you are the only person caring for the child—and cannot express your feelings, it may gradually lead to feeling depressed. They are connected.”  Different concepts (10/31)  M05_G08: “Sadness and depression should not be placed together. Sadness is more of a subjective emotional feeling of being hurt, whereas depression is more like a situation or event that leads to emotional distress.”  M08_G12: “There is a difference. Sadness is a deeper emotional experience affecting one’s inner feelings, while depression is relatively more superficial and may pass quickly.” |
| 17 | feel hopeless? | 28/31 | 3/31 | 28/31 | 3/31 | M11_B11: “Feeling hopeless about the future. For mothers like us…”  F01_B08: “Feeling hopeless about the future can be understood in two ways…” | AR1 Lack of relevance (3/31)  M16_B08: “I have never thought about the future … it is impossible to plan for the future.”  Unclear whether the respondent understood the item (3/31)  M05_G08: “Feeling hopeless about the future is actually quite abstract … it is difficult to answer without knowing exactly what kind of ‘hope’ it refers to.” | Abstract/future-oriented; common for caregivers of special-needs children |
| 18 | feel you lacked control over your day-to-day life? (e.g. you had no choice over what you did or how things were done for you) | 26/31 | 5/31 | 20/31 | 11/31 | F02_B10: “For example, I want to cook but I cannot do it…” F07_B08: “you have no choice and cannot act according to your own wishes…” | AR2 Lack of acceptability/relevance due to misunderstanding (5/31)  M05_G08: “No, I don’t have this. Feeling a lack of control over day-to-day life would only happen when someone has a serious physical or mental illness.”  U1 Misinterpretation / ambiguous meaning (2/31)  F02_B10: “Some people might have delusions and think others want to harm them … They may feel that they cannot control what others do to them.”  U2 Difficulty interpreting / odd wording (1/31)  M18_B10: “It’s hard for me to relate it to concrete examples in everyday life.”  U3 Narrow interpretation (3/31)  M05_G08: “Feeling a lack of control over daily life would only happen if someone had a serious physical or mental illness.”  U5 Multidimensional interpretation conflict (1/31)  M09_G08: “Lacking control over daily life and lacking choice in what you do are two different things … perhaps they should be separated into two items.”  U6 Example-related problems (4/31)  F02_B10: “I don’t quite understand the example ‘what others do to you.’ … I think this example may not be necessary.” | Examples (“what others do to you”) problematic; some interpreted as severe illness/delusions |
| 19 | feel unable to cope with day-to-day life? | 22/31 | 7/31 | 26/31 | 5/31 | M01_B10: “…being unable to cope with everyday tasks… clothes are there and you keep thinking about washing them but never do…”  F04_B12: “certain daily tasks I cannot manage…” | AR1 Lack of relevance (4/31)  M11_B11: “In our daily life everything is generally fine.”  AR2 Lack of relevance due to misunderstanding (3/31)  F03_B10: “…only someone with a serious mental disorder would be like that.”  U2 Difficulty interpreting / odd wording (3/31)  M11_B11: “The wording feels a bit confusing … the sentence seems somewhat contradictory.”  U3 Narrow interpretation (1/31)  F03_B10: This would probably refer to someone having a psychological breakdown, or even a psychiatric disorder……Only a person with mental illness would be in such a state.  U5 Multidimensional interpretation conflict (1/31)  F08_B12: “If the child is included, then I might feel unable to cope. But if it only refers to myself, then it would not be a problem … that would lead to different answers.” | Wording seen as contradictory/confusing; narrow view as mental breakdown |
| 20 | feel excluded by others? (e.g. felt like you did not belong or were not able to be yourself) | 19/31 | 12/31 | 26/31 | 5/31 | F07_B08: “Being excluded by others means feeling isolated or sensing hostility…” M19_G08: “Being excluded by others means that people do not like you…” | AR1 Lack of relevance(12/31) F11_B13: “…I am not currently working and mostly stay at home to take care of my child. I do not interact with many people, so I do not feel excluded by others.”  U2 Difficulty interpreting/odd wording (1/31)  M05_G08: “This question does not seem very specific or representative. There are many possible situations, and it feels too abstract.”  U6 Example-related problems(4/31)  M08_G12: “These two questions feel quite abstract. It is not clear whether the sense of belonging refers to social groups, family, or the workplace. It is difficult to define, and it is also unclear in what sense one cannot be oneself, so it is somewhat abstract and difficult to answer.”  F01_B08: “I am not sure how ‘being unable to be yourself’ is strongly related to being excluded.” | Abstract; low relevance for stay-at-home caregivers; examples not clearly linked |
| 21 | have negative feelings about yourself? | 26/31 | 5/31 | 27/31 | 4/31 | F02_B10: “When helping my child with homework… I may feel that it is my own fault.” F11_B13: “Negative feelings about oneself mean feeling that you have not done well…” | AR1 Lack of acceptability/relevance (5/31) M17_B09: “Negative feelings about myself, currently I do not have this situation.”  U1 Misinterpretation / ambiguous meaning (1/31)  M11_B11: “I told him something private, but he went outside and told others. So I felt very resentful toward him and uncomfortable when I saw him.”  U2 Difficulty interpreting / odd wording (3/31)  F09_B08: “I don’t quite understand. Maybe it would help if an example was provided.” | Some requested examples; occasional misinterpretation as resentment toward others |
| 22 | have physical pain? | 28/31 | 3/31 | 28/31 | 4/31 | F02_B10: “Sometimes I have neck pain, sometimes pain in my shoulders…” F10_B08: “I think it simply refers to physical pain—for example stomach pain…” | AR1 Lack of relevance (2/31) M05_G08: “For those who are physically healthy, there is generally no physical pain.”  AR2 Lack of relevance due to misunderstanding (1/31) M08_G12: “I interpreted it as referring to somatic symptoms … I do not have these symptoms.”  U1 Misinterpretation / ambiguous meaning (3/31) F06_B08: “If it referred to self-harm or injury, then I could understand physical pain …”  U3 Narrow interpretation (1/31) M08_G12: “I understood it as referring to somatic symptoms … caused by depression or anxiety.” | Some linked to somatic symptoms of depression/anxiety |
| 23 | how much physical pain you had? | 27/31 | 4/31 | 28/31 | 3/31 | F01_B08: “One experience… waking up in the morning with severe stomach pain.” F05_B09: “Physical pain is actually quite easy to understand—it mainly refers to the level of pain…” | AR1 Lack of relevance(4/31)  F06_B08: “This has nothing to do with me……When I take care of my child, the burden I experience is more psychological rather than physical.”  U2 Difficulty interpreting / odd wording (3/31) F06_B08: I couldn’t really understand it either. When my son was receiving treatment, they tried to help him gradually adapt and gradually tolerate the pain … But as for parents, how would they even have a degree of physical pain? | Some wanted more examples (joint pain, headaches); seen as physiological rather than psychological M08_G12: “It might be helpful to provide examples … for example joint pain or headaches. Those examples would be clearer and more specific.” |
| 24 | have physical discomfort? (e.g. feeling sick, breathless, itching) (not including pain) | 27/31 | 4/31 | 27/31 | 4/31 | F01_B08: “Because I have high blood pressure… discomfort in my chest…” F02_B10: “if I cannot sleep and feel unwell—such as feeling nauseous…” | AR1 Lack of acceptability/relevance(4/31) F05_B09: “I don’t have nausea, breathlessness, or itching.”  U1 Incorrect or ambiguous interpretation (1/31)  M08_G12: “The exact meaning of this item is not very clear to me.”  U6 Issues with examples (3/31)  M20_B08: “Examples like nausea, breathlessness, or itching do not seem very representative. For example, nausea does not occur very often in daily life……throat pain or throat discomfort caused by ‘internal heat’ is more common. Some people may also have stomach pain, which is somewhat similar to nausea. | Examples not representative; confusion with previous pain question |
| 25 | how much physical discomfort you had? | 29/31 | 2/31 | 29/31 | 2/31 | F07_B08: “The discomfort is very mild. You can tolerate it…” F11_B13: “‘The degree of physical discomfort’: mild discomfort does not greatly affect daily life…” | AR1 Lack of acceptability/relevance (2/31)  F06_B08: “I find it strange that the questionnaire keeps asking about physical problems. … I cannot really answer questions about physical health.”  U1 Incorrect or ambiguous interpretation (2/31)  F09_B08: “I don’t understand it … it is difficult for us to measure something like this.” | Some questioned relevance in a psychological questionnaire |

Table A5 Comprehensiveness of EQ-HWB

| **Category** | **Frequency** | **Description** |
| --- | --- | --- |
| **Reporting the instrument as comprehensive** | 16/31 | Participants considered that the instrument broadly captured their experiences of health and quality of life.  *M01_B10: “It basically covered almost everything… overall it is very comprehensive.”* |
| **Reporting the instrument as not comprehensive** | 15/31 | Participants felt that some important aspects were still not covered by the instrument. |
| **COM1 Coverage issue: Missing content** | | |
| **Caregiving-specific burden** | 14/31 | The instrument did not sufficiently capture caregiving challenges and psychological burdens in situations involving behavioural problems of the care recipient.  *M08_G12: “For example, when a child has an episode, such as a tantrum or serious emotional problems, what is your reaction at that moment? Some people may break down and cry, while others may try to stay calm and deal with it. I think these reactions may also reflect a person’s mental health.”* |
| **Economic/financial burden** | 13/31 | Financial stress was not included but was considered an important component of quality of life.  *F06_B08: “The financial pressure on the family is very high… income decreases while expenses increase.” F03_B10: “Because financial conditions are very important for our mental and physical health.”* |
| **Social support/relationship domain** | 12/31 | Family relationships, social networks, and experiences of stigma were not sufficiently reflected.  *M02_B13: “You could add social relationships, such as the frequency of contact with friends or family.”*  *M15_B17: “You could include advocacy and community initiatives, such as children’s social welfare and support systems.”* |
| **Appetite/eating impacts** | 4/31 | Stress and emotional states may influence appetite and eating, but this was not addressed by the instrument.  *M12_B08: “When I feel very stressed, I lose my appetite… I don’t really feel like eating.”* |
| **Positive emotions/hope/meaning** | 4/31 | The instrument mainly focuses on negative emotions and lacks assessment of positive emotions or sense of meaning.  *M13_B14: “It could also explore things from a more positive perspective, such as whether someone has been understood, supported, or cared for in the past seven days. If these things occur frequently, it may indicate stronger social support and better wellbeing.”* |
| **COM2 Coverage issue: Item overlap** | | |
| **Item1 Performing usual activities (e.g., work, shopping, housework) vs Item19. Feeling unable to cope with daily life** | 3/31 | *F06_B08: “This seems similar to the earlier question about whether your child affects your normal daily life. It feels almost the same as the earlier question about whether you can cope with daily life. For example, if you cannot cope, does that mean you cannot even brush your teeth or wash your face? It feels like the same idea expressed in different ways. A more everyday or conversational phrasing might be clearer.”* |
| **Item9. Feeling lonely vs Item10. Feeling that others do not support you vs Item20. Feeling isolated from others** | 8/31 | *M02_B13: “Feeling lonely may come from lacking social relationships or insufficient support from one’s social network.”*  *M01_B10: “Being isolated may mean not being able to integrate into social circles, or not receiving support from family or others.”*  *F08_B12: “When people feel a sense of belonging, they naturally develop motivation for social interaction… At home, if family relationships are good, you may not feel lonely.”* |
| **Item15. Feeling frustrated vs Item16. Feeling sad or depressed vs Item17. Feeling hopeless about the future vs Item21. Having negative feelings about yourself** | 7/31 | *M18_B10: “Frustration and what was mentioned earlier seem very similar. They are both emotional states. Sadness seems more severe. In my understanding, sadness represents a stronger emotional state than frustration.”*  *F01_B08: “Items 15–17 seem somewhat similar, and also item 21 about negative feelings about oneself. These emotions may represent different levels—first anxiety, then frustration, then sadness or depression, and finally hopelessness.”* |
| **Item18. Feeling a lack of control over daily life (e.g., unable to choose what you do or what others do to you) vs Item19. Feeling unable to cope with your daily life** | 17/31 | *M05_G08: “It’s quite similar to the previous question. Losing control and being unable to cope with daily life are basically the same idea, just expressed differently. If you lose control, then you can’t cope with your daily life.”*  ***Prefer Item 18****:* ***6/31***  *M17_B09: “‘Unable to cope’ means that things have already reached a point where they cannot be handled. But ‘lack of control over life’ suggests that you simply have not yet found a solution. If you really want to deal with it, you can still find ways to solve many problems in life. So I would choose Item 18.”*  ***Prefer Item 19: 11/31***  *M08_G12: “Control and coping represent different levels. Coping feels more like passively dealing with something or just managing the basics, while control implies a stronger ability to manage situations or even make demands of others. I think ‘being unable to cope with daily life’ reflects health status more directly, whereas ‘lack of control’ may involve many external factors and is therefore harder to interpret.”* |

Table A6 Appropriateness of Response Options of EQ-HWB

| **Category** | **Frequency** | **Description** |
| --- | --- | --- |
| **Severity scale** | 28/31 | **No difficulty /Slight difficulty/Moderate difficulty/A lot of difficulty/Unable** *M01_B10 (00:58:16): “No difficulty means being able to do these things easily and smoothly, without too many concerns or feelings of anxiety—just going to work and handling things calmly. Slight difficulty means that most people may experience some pressure or minor problems when doing things, but they can still manage one or two issues. Moderate difficulty means the challenges start to accumulate and you may feel somewhat overwhelmed, with pressure building up inside. A lot of difficulty means the situation becomes more serious, with many obstacles encountered in doing things. If it is ‘unable to do,’ then essentially the person cannot complete these activities.”* |
| **Frequency scale** | 28/31 | **None of the time/A little of the time/Sometimes/Often/Most or all of the time** *M01_B10 (01:23:17): “For example, ‘None of the timer’ could mean 0%. ‘A little of the time’ might be around 10%. ‘Sometimes’ might be about one-third of the time. ‘Often’ could be around half of the time. ‘Most or all of the time’ might be around 70–80%, and so on.”* |
| **Some response categories may be redundant** | 2/31 | *M03_B09: “For severe physical pain, I think ‘severe’ and ‘very severe’ are a bit redundant. If it is already severe, that is already very serious. It might be enough to use three levels—mild, moderate, and severe—and remove the ‘very severe’ option.”* |
| **Preference for response options (“frequency” vs. “severity”) in “physical pain” items** | | |
| **Prefer severity** | 12/31 | *M10_B14: “The first one refers to frequency, while the latter refers to degree. Regardless of how often it occurs, the experience is ultimately reflected in the degree. Even if the pain lasts the whole day, the degree still captures how intense the experience is and reflects one’s physical and mental health status. Even if it occurs frequently, if it does not feel painful, then your overall health may still be good.”* |
| **Prefer frequency** | **9/31** | *F02_B10: “I think frequency would be better because degree is harder to quantify. For example, ‘very rarely’ might mean once or twice, maybe one day; ‘sometimes’ might mean around two days; and ‘often’ might mean three or four days.”* |
| **No preference** | **10/31** | *F11_B13: “They are more or less the same. These questions are asking about very similar things.”* |
| **Preference for response options (“frequency” vs. “severity”) in “physical discomfort” items** | | |
| **Prefer severity** | **14/31** | M10_B14: “Regardless of the frequency, the experience can still be reflected through severity. Even if the pain lasts for a whole day, the severity captures how strongly the person experiences it and reflects their physical and mental health status. Even if it occurs frequently but does not feel painful, it may still indicate good health.” |
| **Prefer frequency** | **9/31** | F02_B10: “I think using ‘frequency’ would be better because ‘severity’ is difficult to quantify. For example, ‘very rarely’ might mean once or twice, maybe one day; ‘sometimes’ might be around two days; and if it occurs three or four days, I would interpret that as ‘often’.” |
| **No preference** | **8/31** | F11_B13: “I think frequency and severity are quite similar, as both reflect health status. If the frequency is high, it may indicate poorer health; if the severity is high, it also suggests poorer health. Overall, they convey roughly the same meaning.” |

Table A7 Appropriateness of recall period of EQ-HWB

| **Category** | **Frequency** | **Description** |
| --- | --- | --- |
| **Correct understanding of the recall period** | 29/31 | *F04_B12: “If it is 7 days, it means once within the past week, which is about one-seventh of the time. In that case, I would probably choose ‘very rarely’.”* |
| **Use of a different recall time frame when answering** | 2/31 | *M17_B09: “Lack of belonging or being unable to be yourself… For example, with our child, we already noticed he was different from others when he was just over one year old.”* |
| **Recall period considered appropriate** | 16/31 | *M19_B08: “Seven days is fine. It can measure your situation over a week. I think that is enough. A week is a natural cycle—you work during the week and have two days off—so it feels like a reasonable frequency.”* |
| **Recall period considered inappropriate** | 15/31 | *M18_B10: “If you want to measure someone’s physical or mental health, seven days may be a bit too short. If the period is too long, people may not remember clearly or may find it difficult to judge an average. But if it is too short, it may not reflect physical health conditions. Maybe 15 days to one month would be more appropriate.” M12_B08: “For example, if it is depression, those problems are usually chronic and long-term. They cannot be captured well within just a few days. I think at least one to three months would be better.” M01_B10: “A longer time frame might be better for me—maybe one month—because some situations only occur periodically. They may not appear in the past seven days but still exist.”* |

Table A8 Suggested modifications to EQ-HWB (n = 31)

| **Item** | **Suggested modifications** |
| --- | --- |
| **1 doing day-to-day activities? (e.g. working, shopping, housework)** | It was suggested that the example “shopping” be replaced with examples more representative of everyday life (e.g. “buying groceries”) (4/31)；  Some participants suggested including caregiving-related activities (e.g. caregiving) in the examples (12/31). |
| **2 doing enjoyable activities? (e.g. leisure, hobbies)** | To improve specificity, “personal hobbies” could be added as an example (2/31). |
| **3 getting around inside or outside? (using e.g. a walking stick or wheelchair if you normally use them)** | It was suggested that “getting around indoors or outdoors” be rephrased using clearer and more everyday expressions (4/31), with the concept clarified further (e.g. “normal walking” or “walking ability”) (5/31).  Examples relevant to the general population (e.g. “going for a walk”) and situations where mobility is limited due to caregiving responsibilities could also be added (2/31). |
| **4 washing, using the toilet, getting dressed, eating, or caring for your appearance?** | The first four activities represent a different level of functioning compared with “caring for your appearance,” which requires a higher level of ability. Participants suggested separating these into two items (10/31). |
| **5 seeing? (using e.g. glasses or contact lenses if you normally use them)** | No clear modification suggestions were proposed. |
| **6 hearing? (using e.g. hearing aids if you normally use them)** | No clear modification suggestions were proposed. |
| **7 have problems with your sleep?** | No clear modification suggestions were proposed. |
| **8 feel exhausted?** | No clear modification suggestions were proposed. |
| **9 feel lonely?** | No clear modification suggestions were proposed. |
| **10 feel that people did not support you?** | No clear modification suggestions were proposed. |
| **11 have difficulty remembering?** | No clear modification suggestions were proposed. |
| **12 have difficulty concentrating or thinking clearly?** | Some participants considered “concentrating” and “thinking clearly” to represent two different concepts and suggested separating them into two items (10/31). |
| **13 feel anxious?** | No clear modification suggestions were proposed. |
| **14 feel unsafe? (e.g. fear of falling, physical harm, abuse)** | The item and examples should maintain conceptual consistency (4/31). |
| **15 feel frustrated?** | Seven participants (7/31) noted that the emotional items “feeling frustrated,” “feeling sad or depressed,” “feeling hopeless about the future,” and “having negative feelings about oneself” appear to be close in emotional intensity and suggested that some of these items could be streamlined. |
| **16 feel sad or depressed?** | Some participants felt that “sadness” reflects a deeper emotional state, whereas “feeling low/down” is more everyday in nature, and therefore suggested separating these into two items (9/31). See also Item 15. |
| **17 feel hopeless?** | See Item 15. |
| **18 feel you lacked control over your day-to-day life? (e.g. you had no choice over what you did or how things were done for you)** | Some participants noted that the example “what others do to you” is inherently difficult to control and does not fully align with the intended concept of the item. They suggested replacing it with examples more closely related to everyday decision-making or restrictions on personal activities (4/31). |
| **19 feel unable to cope with day-to-day life?** | Some participants considered this item conceptually similar to Item 18. If only one were retained, 6/31 preferred “lack of control,” as it reflects a situation where solutions have not yet been found, whereas 11/31 preferred “unable to cope with day-to-day life,” considering it a better reflection of health status. |
| **20 feel excluded by others? (e.g. felt like you did not belong or were not able to be yourself)** | Some participants noted that the example “unable to be yourself” does not clearly capture the concept of exclusion or isolation. They suggested using examples that more directly reflect rejection, neglect, or lack of belonging (4/31). |
| **21 have negative feelings about yourself?** | See Item 15. |
| **22 have physical pain?** | Some participants felt this item overlaps with Item 23. When comparing response formats, 12/31 participants preferred a severity scale, believing that pain intensity better reflects health status; 9/31 preferred a frequency scale because pain severity is difficult to quantify; another 10/31 considered both approaches acceptable. |
| **23 how much physical pain you had in the last 7 days?** | See the discussion under Item 22 regarding “severity vs frequency.” |
| **24 have physical discomfort? (e.g. feeling sick, breathless, itching) (not including pain)** | Some participants felt this item overlaps with Item 25. Fourteen participants (14/31) preferred a severity scale, 9/31 preferred a frequency scale, and 8/31 considered both approaches acceptable. |
| **25 how much physical discomfort you had in the last 7 days?** | See the discussion under Item 24 regarding “severity vs frequency.” |
| **Response options** | Some participants suggested reducing the severity response categories to three levels (mild, moderate, severe) and removing the “very severe” category (2/31). |
| **Recall period** | Fifteen participants (15/31) felt that the recall period of “the past 7 days” was too short and suggested extending it to two weeks or one month. |
